# Supplementary material for: Quantifying the range of the dust direct radiative effect due to source mineralogy uncertainty
Source: Copernicus journal article supplement (doi:10.5194/acp-2020-547), 2020-09-15
Supplement: Supplementary file [file acp-2020-547-AC2-supplement.pdf]

*Supplement of*

## **Response to Referee 2**

**Longlei Li et al.**

[ll859@cornell.edu](mailto:ll859@cornell.edu)

Received and published: 16 October 2020

The copyright of individual parts of the supplement might differ from the CC BY 4.0 License.

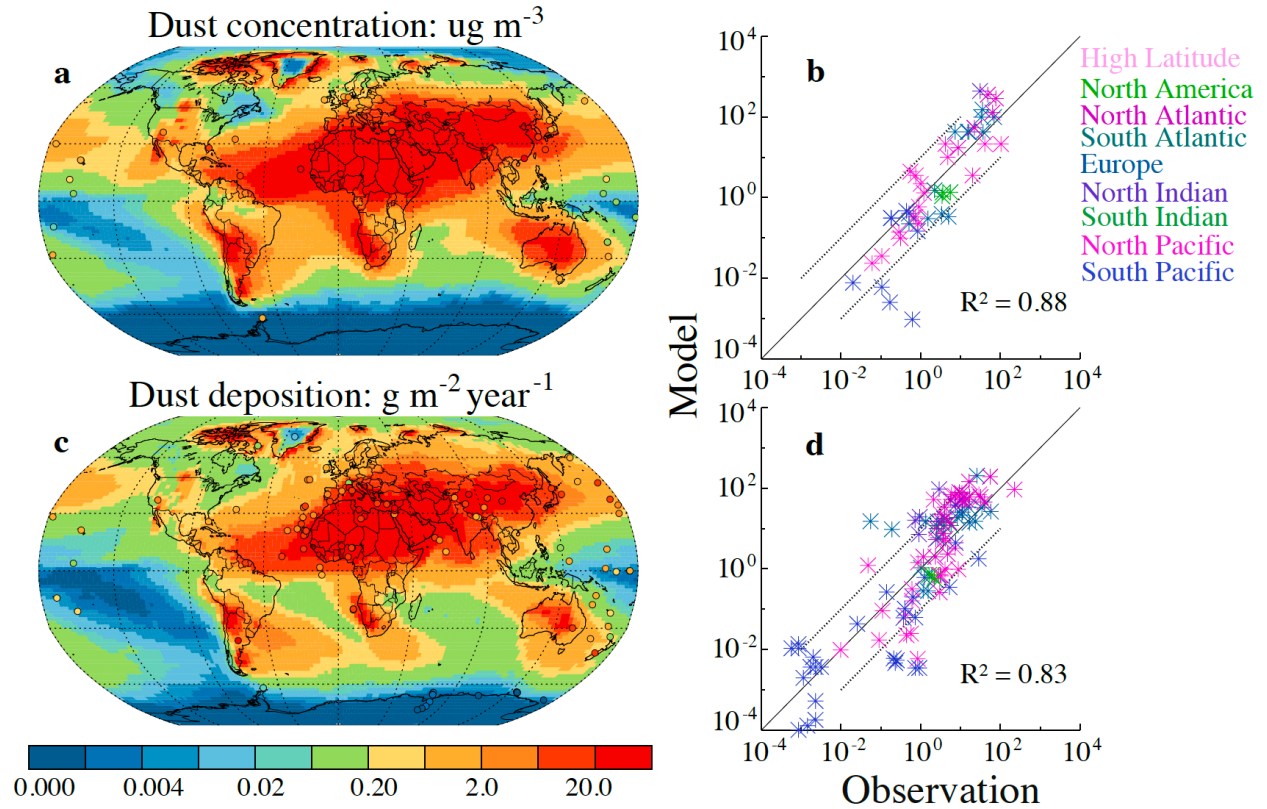

**Figure R1.** Comparison of simulated (the baseline case; see text for details) dust surface concentration, and deposition with observations. Also shown is correlation (both passed 95% statistically significant tests) between modeling and observations over sub-domains as indicated by texts in color. The dash lines in (b) and (d) represent 10:1 (upper left) and 1:10 (bottom right) lines.
